# Supplementary material
Source: PubMed Central journal article supplement (PMC3383772)

# Activity and Crystal Structure of *Arabidopsis thaliana* UDP-*N*-acetylglucosamine Acyltransferase

*Sang Hoon Joo, Hak Suk Chung, Christian R. H. Raetz, Teresa A. Garrett*

*Supporting Information*

### **Figure S1. Sequence alignment of AtLpxA and EcLpxA.**

Panel A: AtLpxA and EcLpxA showed 38% identity (red) and 53% similarity according to the alignment result by clustalW<sup>9</sup>. Highlighted regions in blue or green represent predicted extra inserts in AtLpxA. The N-terminal region of AtLpxA (underlined) is predicted to be a signal peptide by Mitoprot software<sup>12</sup>. Amino acids 1-32 were removed and replaced by a methionine residue during cloning of SJD-01.

Panel B: Alignment of AtLpxA and EcLpxA considering the AtLpxA crystal structure. The residues with insufficient electron densities to build into the model are indicated in grey. Abbreviations: PB, parallel beta strand; T, turn.

A.

|                   |        | PB1     | T1    | PB2    | T2     | PB3   | T3     |      |                                               |      |      |        |       |            |     |     |     |   |       |     |
|-------------------|--------|---------|-------|--------|--------|-------|--------|------|-----------------------------------------------|------|------|--------|-------|------------|-----|-----|-----|---|-------|-----|
|                   | AtLpxA |         |       |        |        |       |        |      | <u>MISLLKAREKLLSPLVSSSTIRRLSSSLSYSRED</u> 33  |      |      |        |       |            |     |     |     |   |       |     |
|                   | EcLpxA |         |       |        |        |       |        |      | -----                                         |      |      |        |       |            |     |     |     |   |       |     |
| C1                | AtLpxA | SRD     | SE    | VLIH   | PS     | AVVH  | PN     | 50   |                                               |      |      |        |       |            |     |     |     |   |       |     |
|                   | EcLpxA | -MID    | KS    | AFVH   | PT     | AIVE  | EG     | 17   |                                               |      |      |        |       |            |     |     |     |   |       |     |
| C2                | AtLpxA | AVIG    | KG    | VSVG   | PY     | CTIG  | SS     | 68   |                                               |      |      |        |       |            |     |     |     |   |       |     |
|                   | EcLpxA | ASIG    | AN    | AHIG   | PF     | CIVG  | PH     | 35   |                                               |      |      |        |       |            |     |     |     |   |       |     |
| C3                | AtLpxA | VKLG    |       |        |        |       |        |      | <u>NGCKLYPSSHVFGNTELG</u> 90 (extra insert 1) |      |      |        |       |            |     |     |     |   |       |     |
|                   | EcLpxA | VEIG    |       |        |        |       |        |      | ----- 21                                      |      |      |        |       |            |     |     |     |   |       |     |
| C3 (continued)    |        |         |       |        |        |       |        |      |                                               |      |      |        |       |            |     |     |     |   |       |     |
|                   | AtLpxA |         | ES    | CVLM   | TG     | AVVG  | D      |      | <u>ELPG</u> 107 (extra insert 2)              |      |      |        |       |            |     |     |     |   |       |     |
|                   | EcLpxA |         | EG    | TVLK   | SH     | VVVN  | G      |      | ---- 52                                       |      |      |        |       |            |     |     |     |   |       |     |
| C4                | AtLpxA | TFIG    | CN    | NIIG   | HH     | AVV   |        |      | <u>GVKQDLKYKHGDECF</u> 139 (loop 1)           |      |      |        |       |            |     |     |     |   |       |     |
|                   | EcKpxA | TKIG    | RD    | NEIY   | QF     | ASI   |        |      | <u>GEVNQDLKY-AGEPTR</u> 83                    |      |      |        |       |            |     |     |     |   |       |     |
| C5                | AtLpxA | LCIG    | NN    | NEIR   | EF     | CSI   |        |      | HR-SSKPSDK 163 (loop 2)                       |      |      |        |       |            |     |     |     |   |       |     |
|                   | EcLpxA | VEIG    | DR    | NRIR   | ES     | VTI   |        |      | REGTVQGGGL 108                                |      |      |        |       |            |     |     |     |   |       |     |
| C6                | AtLpxA | TVIG    | DN    | NLIM   | GS     | CHIA  | HD     | 181  |                                               |      |      |        |       |            |     |     |     |   |       |     |
|                   | EcLpxA | TKVG    | SD    | NLLM   | IN     | AHIA  | HD     | 126  |                                               |      |      |        |       |            |     |     |     |   |       |     |
| C7                | AtLpxA | CKIG    | DR    | NIFA   | NN     | TLLA  | GH     | 199  |                                               |      |      |        |       |            |     |     |     |   |       |     |
|                   | EcLpxA | CTVG    | NR    | CILA   | NN     | ATLA  | GH     | 144  |                                               |      |      |        |       |            |     |     |     |   |       |     |
| C8                | AtLpxA | VVVE    | DN    | THTA   | GA     | SVVH  | QF     | 217  |                                               |      |      |        |       |            |     |     |     |   |       |     |
|                   | EcLpxA | VSVD    | DF    | AIIG   | GM     | TAVH  | QF     | 162  |                                               |      |      |        |       |            |     |     |     |   |       |     |
| C9                | AtLpxA | CHIG    | SF    | AFIG   | GG     | SVV   | SQ     | 234  |                                               |      |      |        |       |            |     |     |     |   |       |     |
|                   | EcLpxA | CIIG    | AH    | VMVG   | GC     | SGV   | AQ     | 179  |                                               |      |      |        |       |            |     |     |     |   |       |     |
| C10               | AtLpxA | DVP     | KY    | MM     |        |       |        | 241  |                                               |      |      |        |       |            |     |     |     |   |       |     |
|                   | EcLpxA | DVP     | PY    | VI     |        |       |        | 186  |                                               |      |      |        |       |            |     |     |     |   |       |     |
| C-terminal domain |        |         |       |        |        |       |        |      |                                               |      |      |        |       |            |     |     |     |   |       |     |
|                   | AtLpxA | VAGERAE | LRGLN | LEGLRR | NGFTM  | SEMKS | LRAAYR | KIFM | STETV                                         | SLSF | EERL | TELE   | QDQEL | 301        |     |     |     |   |       |     |
|                   | EcLpxA | AQGNH   | ATPFC | VNI    | EGLKRR | GF    | SREAIT | AI   | RNAY                                          | KLI  | YRS  | GK---- | TL    | DEVKPEIAEL | AET | 242 |     |   |       |     |
|                   | AtLpxA | YSVPA   | VSA   | MLQS   | I      | RDS   | F      | TES  | RR                                            | GICK | FR   | Q      | W     | L          | D   | STT | 336 |   |       |     |
|                   | EcLpxA | Y--     | PEV   | K      | A      | F     | T----  | D    | F                                             | A    | R    | S      | T     | R          | G   | L   | I   | R | ----- | 262 |

**B.**

|     |        | PB1  | T1 | PB2  | T2 | PB3  | T3 |                  |              |
|-----|--------|------|----|------|----|------|----|------------------|--------------|
| C0  | AtLpxA | DSRD | SE | VLIH | PS | AVVH | PN | 50               |              |
|     | EcLpxA | ---- | -- | ---- | -- | ---- | -- |                  |              |
| C1  | AtLpxA | AVIG | KG | VSVG | PY | CTIG | SS | 68               |              |
|     | EcLpxA | -MID | KS | AFVH | PT | AIVE | EG | 17               |              |
| C2  | AtLpxA | VKLG | NG | CKLY | PS | SHVF | GN | 86               |              |
|     | EcLpxA | ASIG | AN | AHIG | PF | CIVG | PH | 35               |              |
| C3  | AtLpxA | TELG | ES | CVLM | TG | AVVG | D  | ELPG             | 107 (loop 0) |
|     | EcLpxA | VEIG | EG | TVLK | SH | VVVN | G  | ----             | 52           |
| C4  | AtLpxA | TFIG | CN | NIG  | HH | AVV  |    | GVKCQDLKYKHGDECF | 139 (loop 1) |
|     | EcKpxA | TKIG | RD | NEIY | QF | ASI  |    | GEVNQDLKY-AGEPTR | 83           |
| C5  | AtLpxA | LCIG | NN | NEIR | EF | CSI  |    | HR-SSKPSDK       | 163 (loop 2) |
|     | EcLpxA | VEIG | DR | NRIR | ES | VTI  |    | HRGTVQGGGL       | 108          |
| C6  | AtLpxA | TVIG | DN | NLIM | GS | CHIA | HD |                  | 181          |
|     | EcLpxA | TKVG | SD | NLLM | IN | AHIA | HD |                  | 126          |
| C7  | AtLpxA | CKIG | DR | NIFA | NN | TLLA | GH |                  | 199          |
|     | EcLpxA | CTVG | NR | CILA | NN | ATLA | GH |                  | 144          |
| C8  | AtLpxA | VVVE | DN | THTA | GA | SVVH | QF |                  | 217          |
|     | EcLpxA | VSVD | DF | AIIG | GM | TAVH | QF |                  | 162          |
| C9  | AtLpxA | CHIG | SF | AFIG | GG | SVV  | SQ |                  | 234          |
|     | EcLpxA | CIIG | AH | VMVG | GC | SGV  | AQ |                  | 179          |
| C10 | AtLpxA | DVP  | KY | MM   |    |      |    |                  | 241          |
|     | EcLpxA | DVP  | PY | VI   |    |      |    |                  | 186          |

C-terminal domain

|        |                                                                  |     |
|--------|------------------------------------------------------------------|-----|
| AtLpxA | VAGERAE LRGLNLEGLRRNGFTMSEMKS LRAAYRKIFMSTETVSLSFEE RLTELEQDQEL  | 301 |
| EcLpxA | AQGNHATPFGVNI EGLKRRGFSREAITAIRNAYKLIYRS GKT L----DEVKPEIAELAE T | 242 |
| AtLpxA | YSVPAVSAMLQSI RDSFTESR RGICKFRQWLDSTT                            | 336 |
| EcLpxA | Y--PEVKAFTDFFARST----RGLIR-----                                  | 262 |

**Figure S2. Overexpression and Purification of AtLpxA from *E. coli* C41 (DE3) strains**

**A. Expression of AtLpxA in *E. coli* C41 (DE3) strain.** Cell lysate was loaded into each lane after boiling for 5 min in Laemmli sample buffer. The predicted molecular weight for AtLpxA is 33,241 Da.

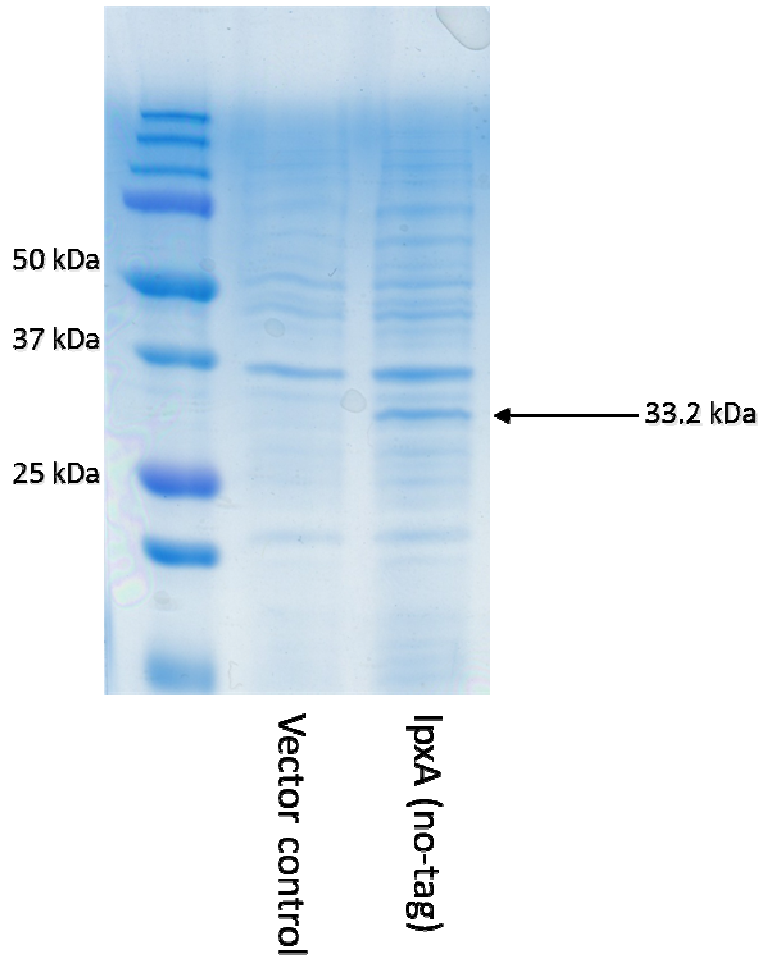

**B. Purification of AtLpxA with Green-19 dye column and size exclusion chromatography.** **Left side**, About 10 mg of protein was purified from 1 liter culture of *E. coli* C41 (DE3) harboring pET-21b(+)-AtLpxA. Lane 1: cell lysate, 2: green column flow through, 3: wash with 0 M KCl, 4: 100 mM KCl, 5: 200 mM KCl, 6: 400 mM KCl, 7: 1 M KCl. **Right side**, chromatogram of AtLpxA in size exclusion gel filtration. The largest peak corresponds to the AtLpxA trimer, and the preceding peaks seem to be aggregates.

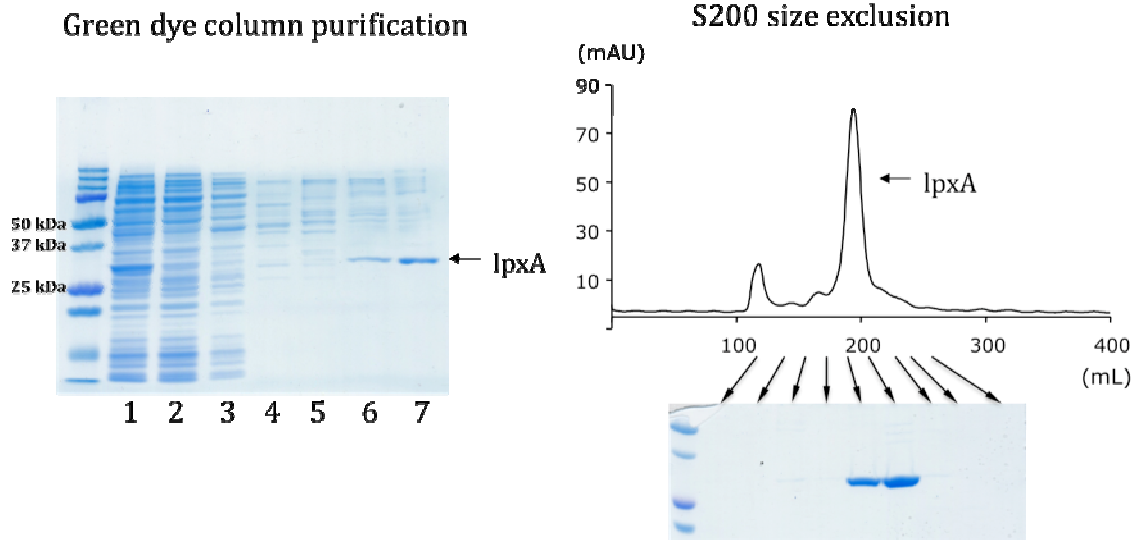

**Figure S3. Construction of *E. coli* mutants lacking chromosomal *lpxA* gene.**

**A.** Scheme for the replacement of *lpxA* by a *kan* cassette.

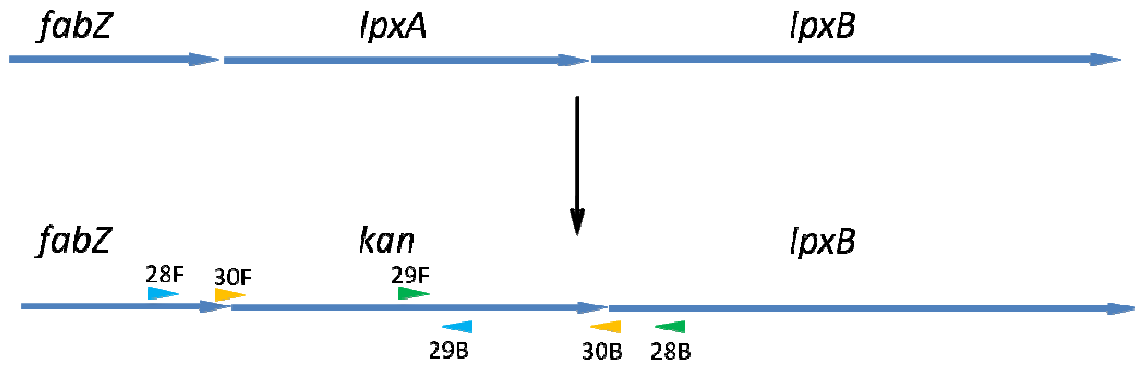

**B.** DNA sequence of the region flanking the *kan* cassette in *lpxA* knockout mutants. Nucleotides for *kan* are capitalized and numbered. DNA sequences corresponding to the PCR primers (SJP-030F, SJP-030B) for *kan* amplification are highlighted in yellow, and underlined are the start and stop codons in the region. The presence of *kan* inserted between *fabZ* and *lpxB* was first screened by amplifying the 3' region of *fabZ* through 5' region of *kan* (primers SJP-028F and SJP029B, highlighted in blue) and the 3' region of *kan* through 5' region of *lpxB* (primers SJP-029F and SJP-028B, highlighted in green). The larger piece of DNA was prepared for DNA sequencing by amplifying the 3' region of *fabZ* through 5' *lpxB* with primers SJP-028F and SJP-028B. Boxed is the ribosome-binding site for *lpxB* expression.

```

ggtgtgctgattctggaagcaatggcacaggcaacaggt
attctggcggttttaaaagcgtaggaaaactggaaccgggt
gagctgtactacttcgctggtattgacgaagcgcgcttc
aagcgcocggctcgtgctggcgatcaaatgatcatggaa
gtcactttcgaaaaaacgcgcccgggcctgacccgtttt
aaaggggttgctctggtcgatggttaaagtagtttgcgaa
gcaacgatgatgtgtgctcgtagccggaggcctgatac

```

```

1 ATGAGCCATA TTCAACGGGA AACGTCTTGC TCTAGGCCGC GATTAAATTC
51 CAACATGGAT GCTGATTTAT ATGGGTATAA ATGGGCTCGC GATAATGTCG
101 GGCAATCAGG TCGGACAATC TATCGATTGT ATGGGAAGCC CGATGCGCCA
151 GAGTTGTTTC TGAAACATGG CAAAGGTAGC GTTGCCAATG ATGTTACAGA
201 TGAGATGGTC AGACTAAACT GGCTGACGGA ATTTATGCCT CTTCCGACCA
251 TCAAGCATTT TATCCGTA CTGATGATG CATGGTTACT CACCACTGCG
301 ATCCCCGGGA AAACAGCATT CCAGGTATTA GAAGAATATC CTGATTCAGG
351 TGAAAATATT GTTGATGCGC TGGCAGTGT CCTGCGCCGG TTGCATTCGA
401 TTCTGTTTTG TAATTGTCCT TTTAACAGCG ATCGCGTATT TCGTCTCGCT
451 CAGGCGCAAT CACGAATGAA TAACGGTTTG GTTGATGCGA GTGATTTTGA
501 TGACGAGCGT AATGGCTGGC CTGTTGAACA AGTCTGGAAA GAAATGCATA
551 AACTTTTGCC ATTCTCACCG GATTCAGTCG TCACTCATGG TGATTTCTCA
601 CTTGATAACC TTATTTTTGA CGAGGGGAAA TTAATAGGTT GTATTGATGT
651 TGGACGAGTC GGAATCGCAG ACCGATACCA GGATCTTGCC ATCCTATGGA
701 ACTGCCTCGG TGAGTTTTCT CTTTATTAC AGAAACGGCT TTTTCAAAAA
751 TATGGTATTG ATAATCCTGA TATGAATAAA TTGCAGTTTC ATTTGATGCT
801 CGATGAGTTT TTCTAA

```

```

aaggag atatacc
atgactgaacagcgtccattaacgattgccctggtcgccg
gagaaacctccggcgatatacctggggccgggtttaatcc
gcgctctgaaagaacatgtgccccaacgccgctttgttg
gtgttgccgggccacgaatgcaggctgaaggctgcaag
cctggtacgaaatggaagaactggcggatggtggcattg
ttgaagtgctcggctcgtcgtcgtcgttactgcataatc
gtgccgatctgacaaaagcgttttggcgaactgaagccag

```



**Figure S4. A bent rod-shape of L $\beta$ H domain of AtLpxA.**

An asymmetric unit of AtLpxA (green) is aligned to a monomer of the trimeric EcLpxA(1LXA, grey colored). Top: top down view from amino terminal side of rotational axis. Bottom: side view. Left Bottom: enlarged view of the coils C0 through C7 in the L $\beta$ H domain. The angle measured between C $\alpha$  carbons of coil C2 (Pro71 of AtLpxA, Pro28 of EcLpxA) and coil C6 (Gly174 of AtLpxA, Ile119 of EcLpxA) at turn T2 regions is  $\sim 7^\circ$  ([the angle between](#) blue lines), and the distance between C $\alpha$  carbons of coil C6 is 2.4 Å.

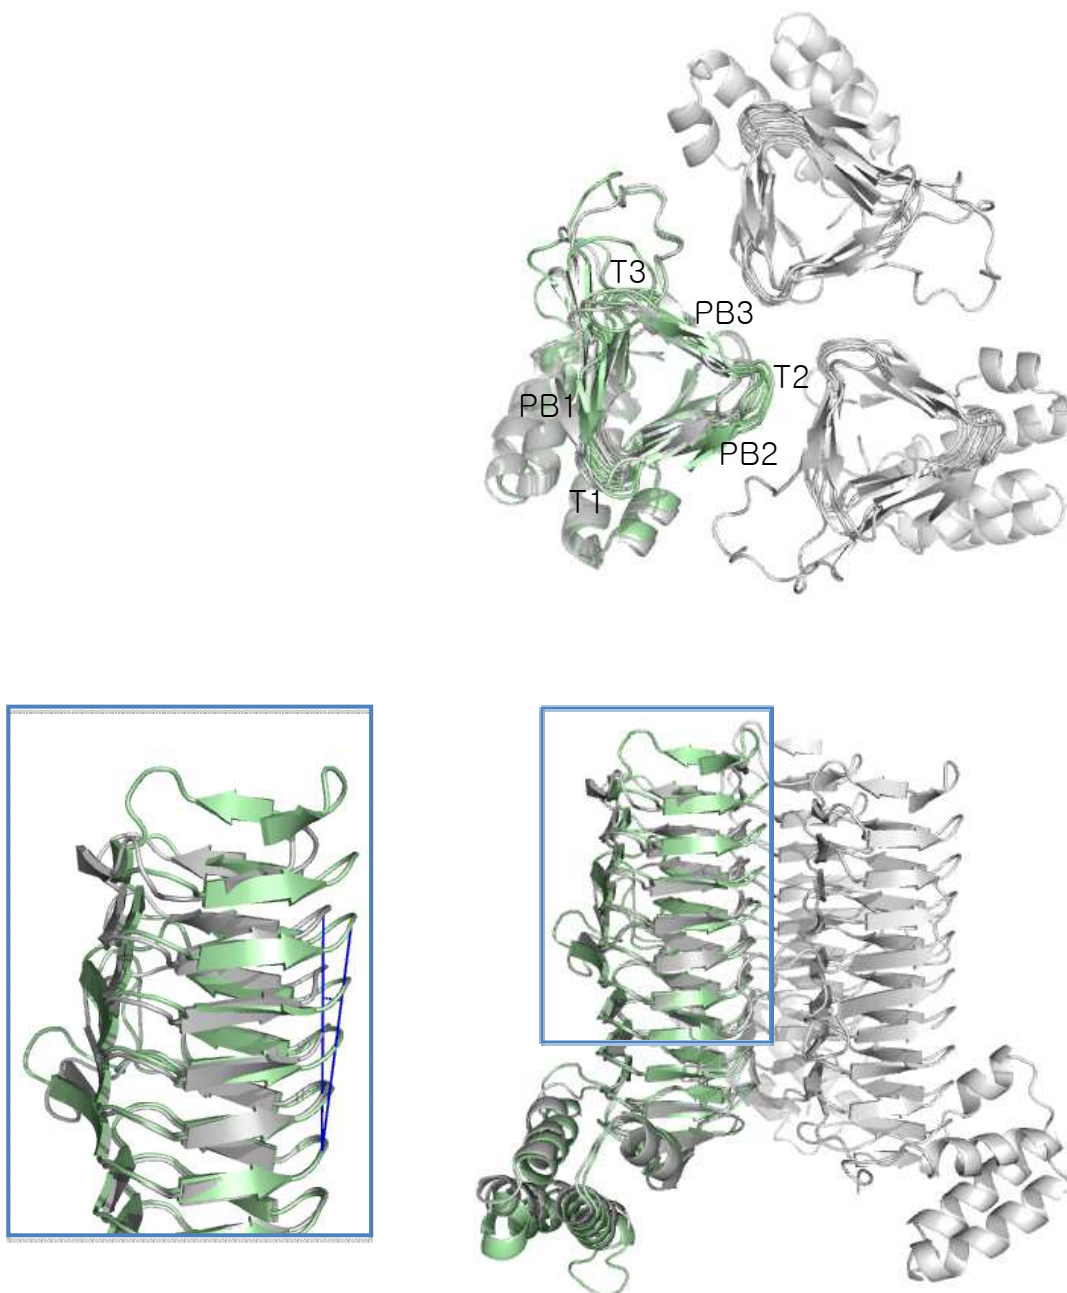

Supplement: NIHMS377680-supplement-1_si_001.pdf [file NIHMS377680-supplement-1_si_001.pdf]
